# Supplementary material for: Biodistribution and Cellular Internalization of Inactivated SARS-CoV-2 in Wild-Type Mice
Source: MDPI journal article supplement (doi:10.3390/ijms23147609), 2022-07-09
Supplement: s1 [file s1]

## Supplementary Materials: Biodistribution and cellular internalization of inactivated SARS-CoV-2 in wild-type mice

Anett Hudák, Gareth Morgan, Jaromir Bacovsky, Roland Patai, Tamás F. Polgár, Annamária Letoha, Aladar Pettko-Szandtner, Csaba Vizler, László Szilák, and Tamás Letoha

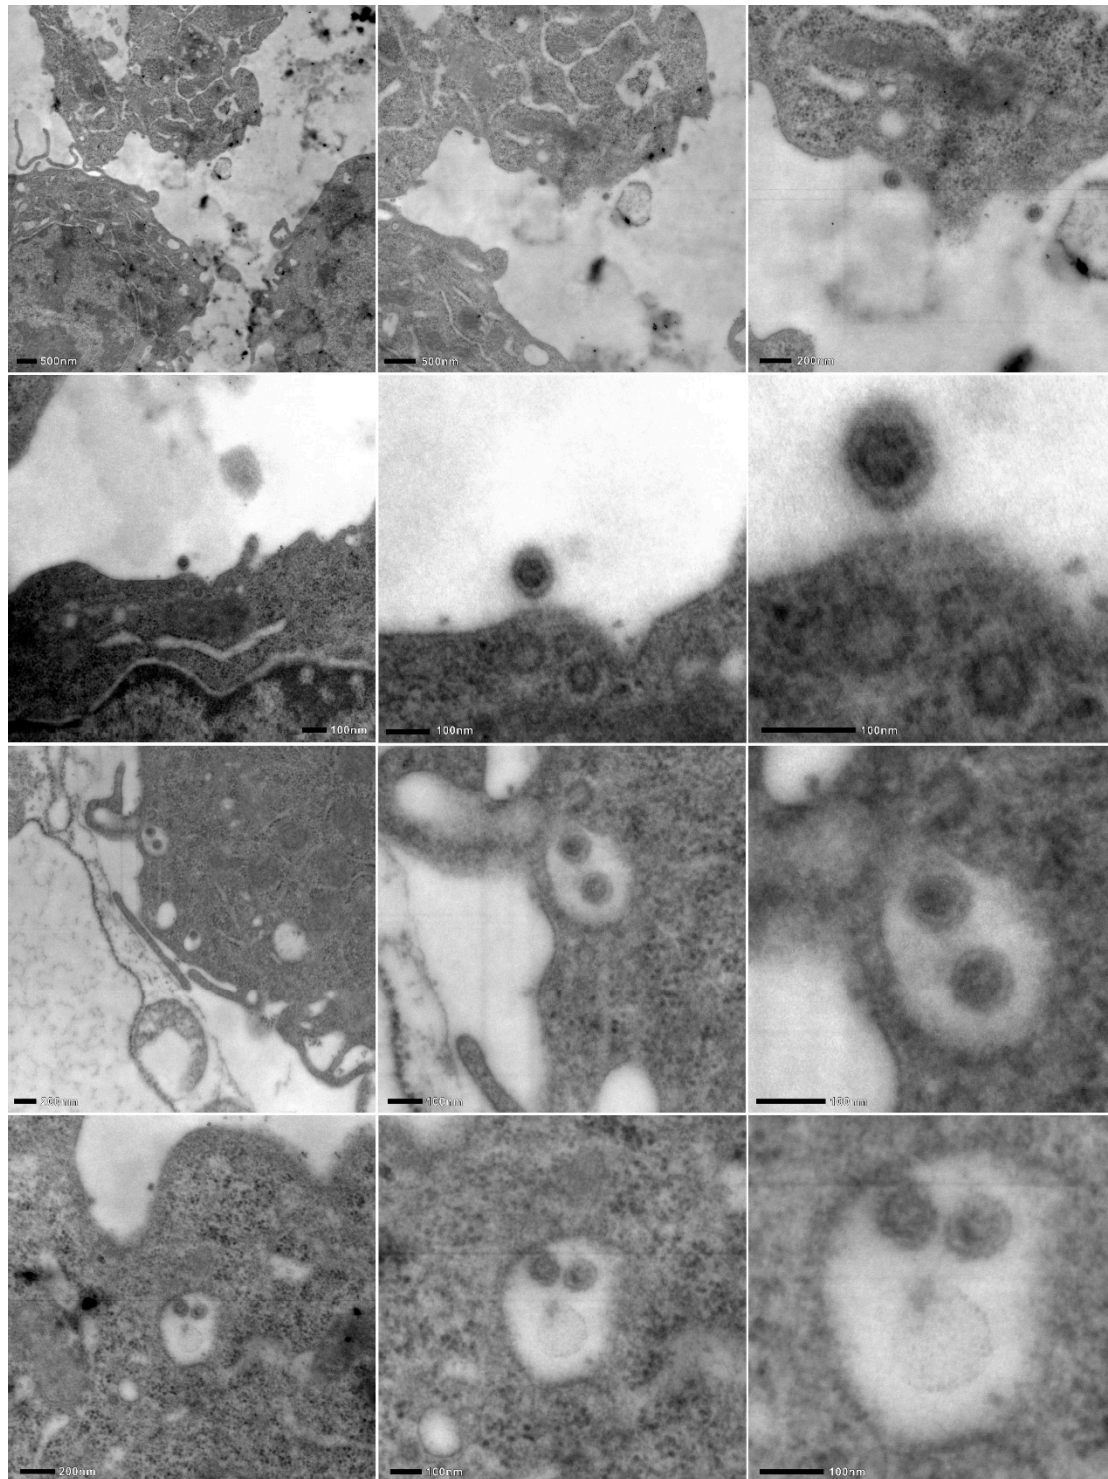

**Figure S1.** Electron microscopic visualization of SARS-CoV-2 internalization into RAW cells. RAW cells were incubated with heat-inactivated SARS-CoV-2 (at 1 MOI) for various amounts of time (10, 30, or 180 min) at 37 °C. After incubation, the cells were washed, fixed, and SARS-CoV-2 internalization was analyzed with a Delong LVEM 25 electron microscope. Representative images of three independent experiments are shown.

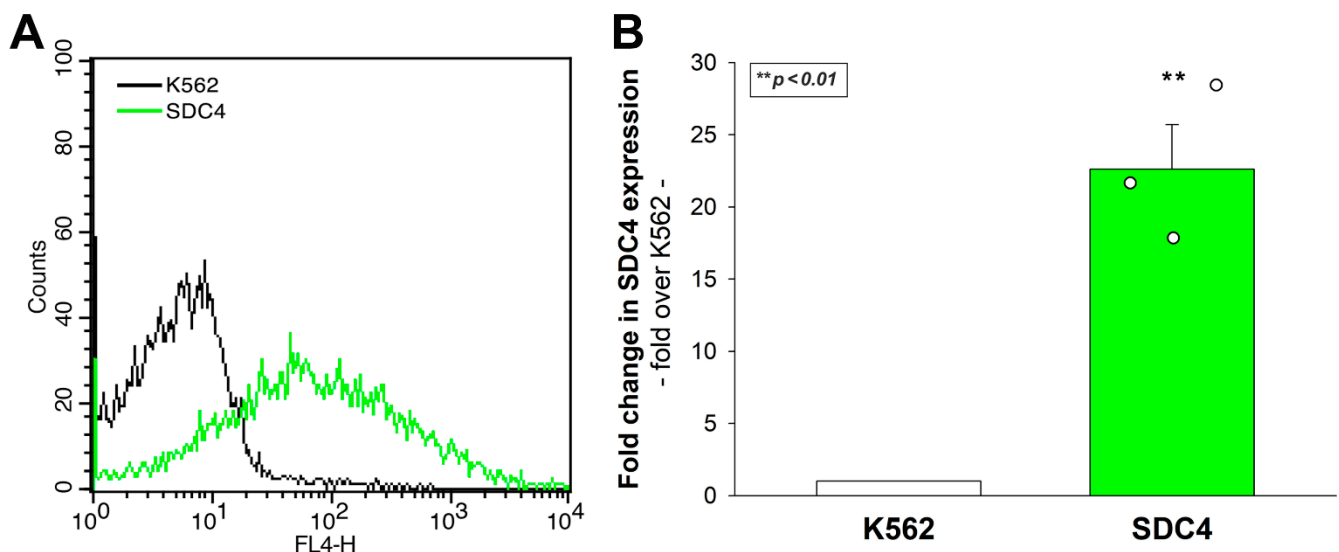

**Figure S2.** SDC4 expression of K562 cells and SDC4 transfectants. Stable SDC transfectants created in wild-type (WT) K562 cells were selected by measuring SDC4 expression with flow cytometry (Becton Dickinson FACScan) using APC-labeled anti-SDC4 antibodies. **A:** Representative flow cytometry histograms showing the SDC4 expression of SDC4 transfectants and WT K562 cells. **B:** Detected SDC4 levels were normalized to WT K562 cells as standards. The bars represent the mean + SEM of three independent experiments. Statistical significance vs. WT K562 cells (standards) was assessed with analysis of variance (ANOVA). \*\*  $p < 0.01$ .

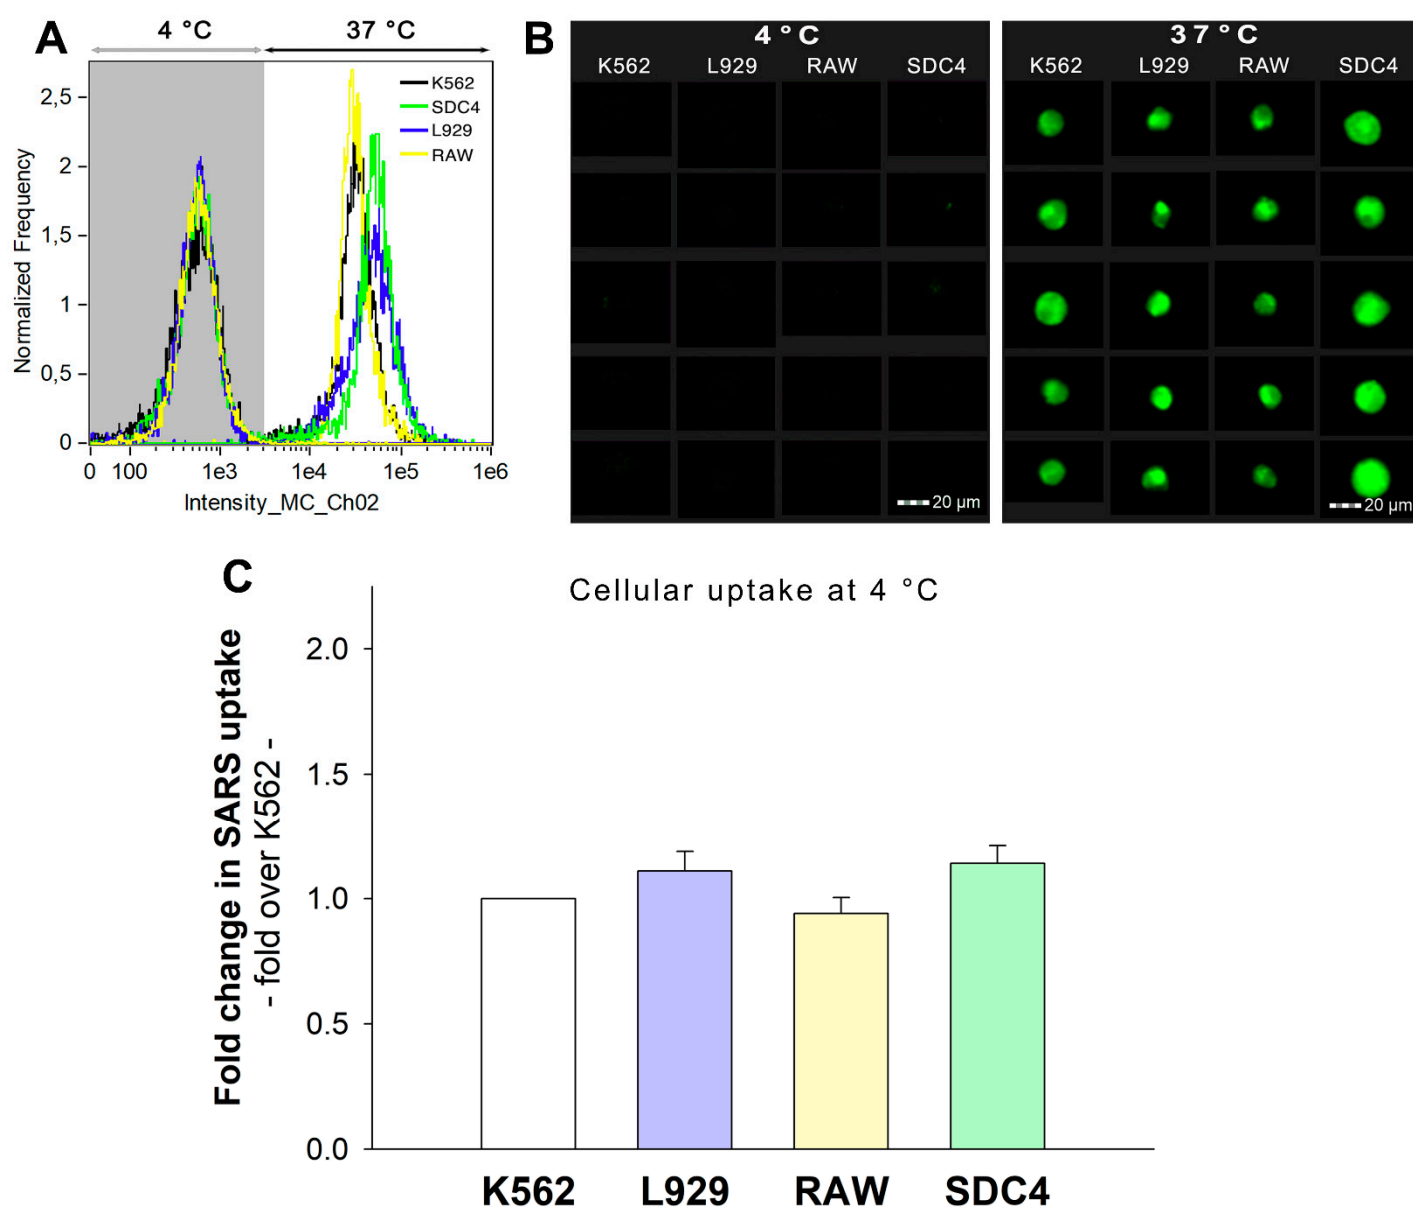

**Figure S3.** Flow cytometric assessment of SARS-CoV-2 uptake in human and murine cell lines at 4°C. L929, RAW, K562 cells, and SDC4 transfectants (created in K562 cells) were incubated with heat-inactivated SARS-CoV-2 (at 1 MOI) for 3 h at 4 °C. After incubation, the cells were washed, trypsinized, fixed, permeabilized, and treated with antibodies specific for the spike glycoprotein (along with AF 488-labeled secondary antibodies). Cellular uptake of SARS-CoV-2 was then analyzed with imaging flow cytometry. **A,B:** Representative flow cytometry histograms and fluorescent images showing the intracellular fluorescence of SARS-CoV-2-treated cells at 4 and 37 °C. **C:** Fluorescence intensities detected in cells treated with inactivated SARS-CoV-2 at 4 °C were normalized to SARS-CoV-2-treated K562 cells as standards. The bars represent the mean + SEM of three independent experiments. Statistical significance vs. standards was assessed with ANOVA. Compared to K562 cells (i.e., standards), no statistically significant differences were detected in the viability of SARS-CoV-2-treated cells.

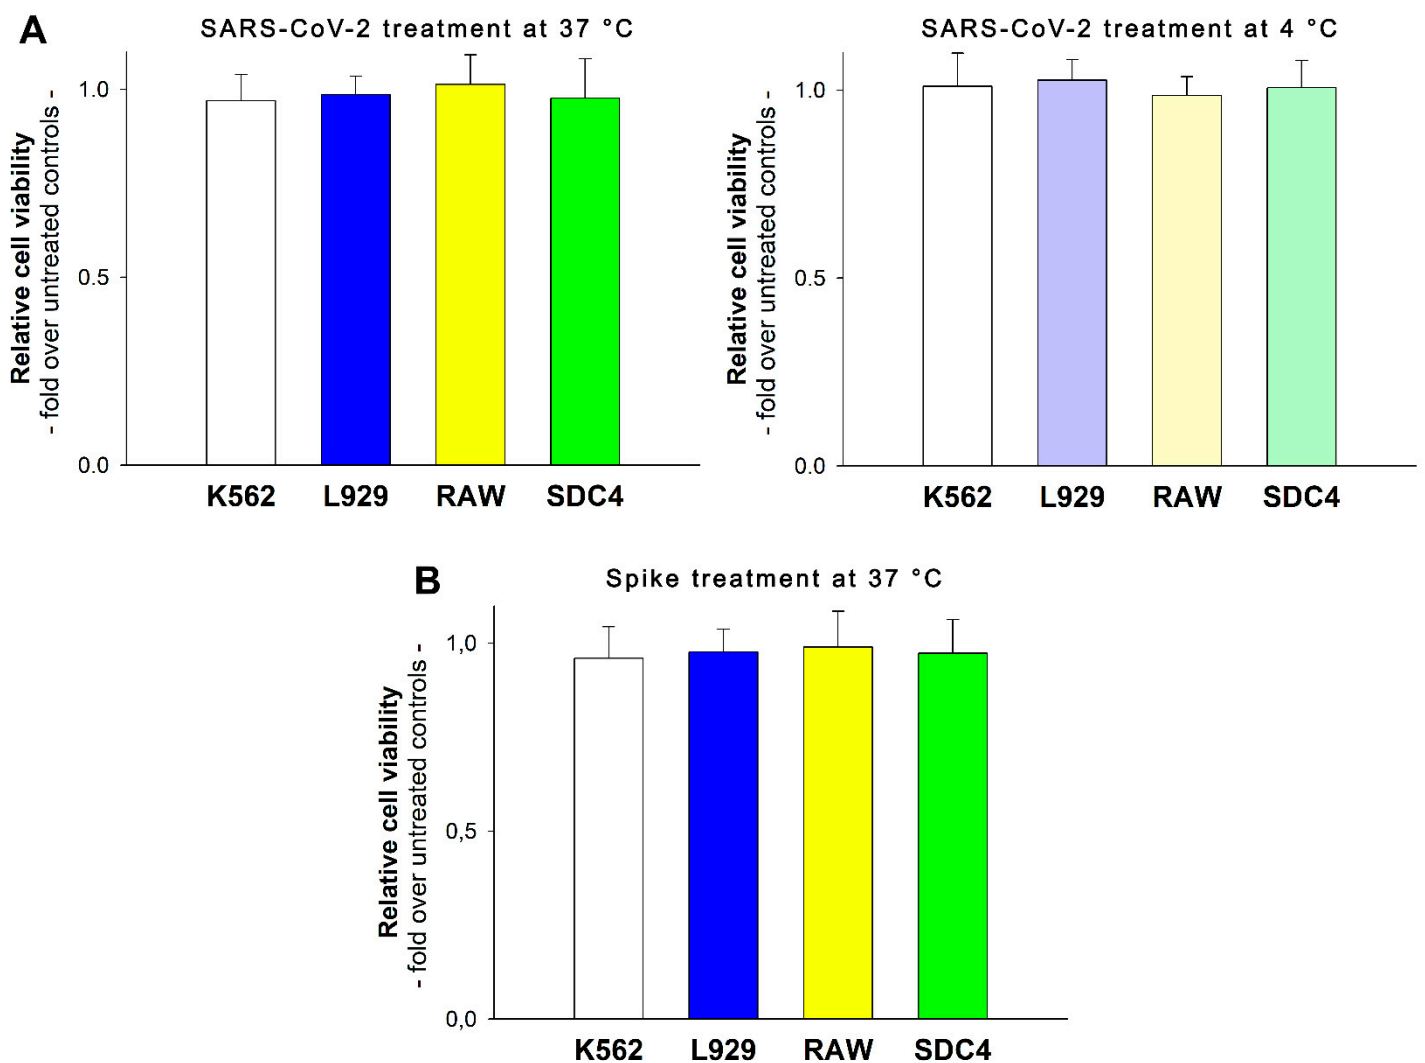

**Figure S4.** Inactivated SARS-CoV-2 and spike does not affect the cellular viability. **A,B:** L929, RAW, K562 cells, and SDC4 transfectants (created in K562 cells) were incubated with heat-inactivated SARS-CoV-2 (at 1 MOI) for 3 h at 37 or 4 °C (**A**) or SARS-CoV-2 spike protein (50 nM) for 3 h at 37 °C (**B**). Cellular viability was then measured with EZ4U assay and detected measures were then normalized to untreated cells as controls. The bars represent the mean + SEM of three independent experiments. Statistical significance vs. controls was assessed with ANOVA. Compared to controls, no statistically significant differences were detected in the viability of SARS-CoV-2-treated cells.

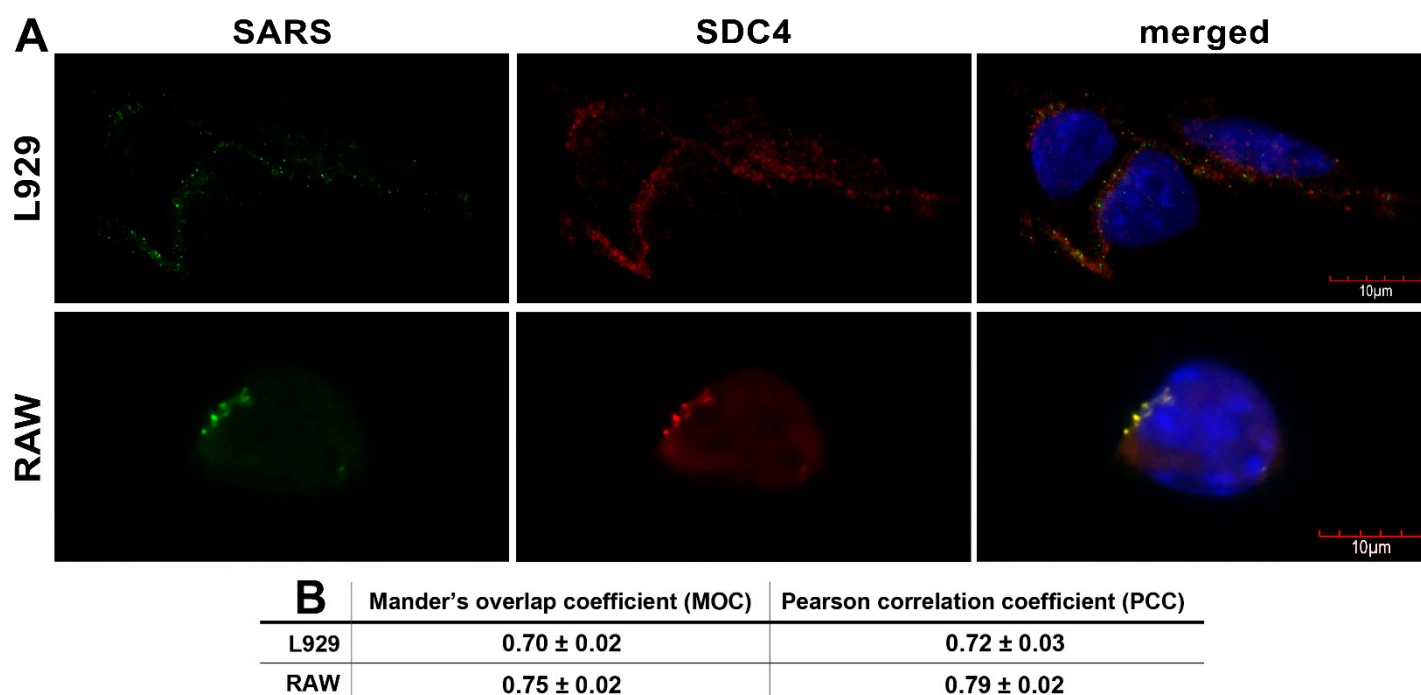

**Figure S5.** SARS-CoV-2 colocalizes with SDC4 on the cell membrane. L929 and RAW cells were incubated with heat-inactivated SARS-CoV-2 (at 1 MOI) for 3 h at 4 °C. After incubation, the cells were washed, fixed, and treated with antibodies specific for the spike glycoprotein (AF 488-labeled) and SDC4 (APC-labeled). Colocalization of SARS-CoV-2 with SDCs was analyzed with confocal microscopy. **A:** Microscopic analyses of SARS-CoV-2 and SDC colocalization. Representative images of three independent experiments are shown. Scale bar = 10  $\mu$ m. **B:** The MOC and PCC  $\pm$  SEM for the overlap and colocalization of SDC with SARS-CoV-2 (indicated below the images) were calculated by analyzing 18 images. Scale bar = 10  $\mu$ m.

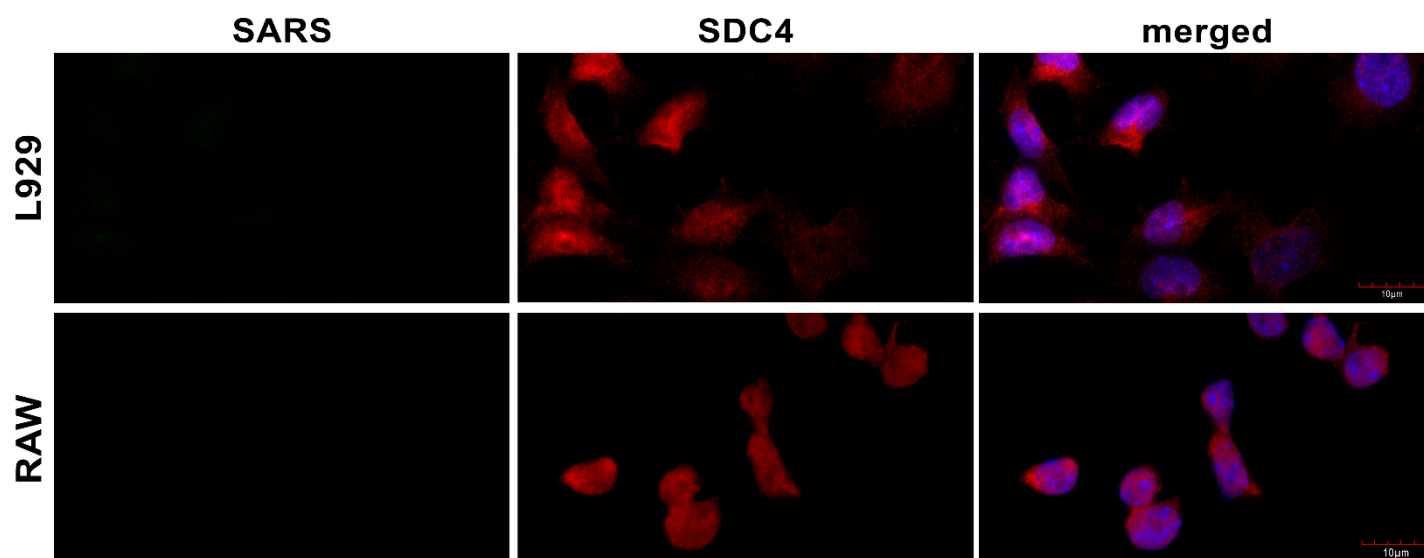

**Figure S6.** Microscopic studies on SARS-CoV-2-untreated control cells (i.e., those receiving no SARS-CoV-2 treatment). L929 and RAW cells untreated with SARS-CoV-2 washed, fixed, permeabilized, and treated with antibodies specific for the spike glycoprotein (and AF 488-labeled secondary antibody) and SDC4 (APC-labeled). Representative images of three independent experiments are shown. Scale bar = 10 µm.

**Table S1.** SDC4 expression of various tissues as presented in the Human Protein Atlas

|               | <b>Protein expression</b> | <b>RNA expression</b> <sup>1</sup> |
|---------------|---------------------------|------------------------------------|
| <b>Brain</b>  | High                      | Medium (nTMP: 110.7)               |
| <b>Heart</b>  | Medium                    | Medium (nTMP: 66.4)                |
| <b>Liver</b>  | Medium                    | High (nTMP: 414.4)                 |
| <b>Lung</b>   | High                      | Medium (nTMP: 169.8)               |
| <b>Spleen</b> | Low                       | Low (nTMP: 32.6)                   |

<sup>1</sup> The RNA-seq tissue data is reported as nTPM (normalized protein-coding transcripts per million), corresponding to mean values of the different individual samples from each tissue.

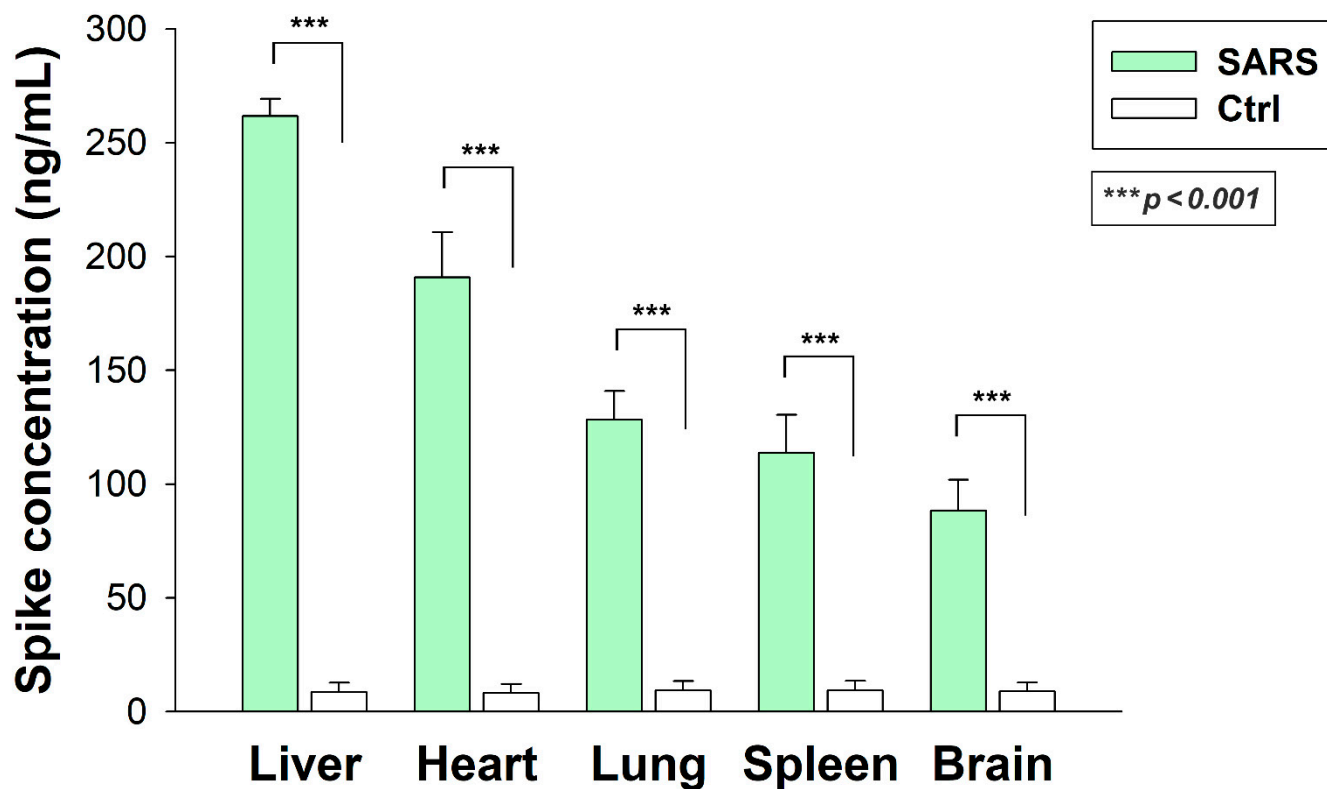

**Figure S7.** SARS-CoV-2 spike concentration in SARS-CoV-2-treated mice (SARS) and untreated controls (Ctrl) measured with a spike-specific ELISA kit. Each group contained 6 animals. The bars represent the mean + SEM. Statistical significance vs controls was assessed with ANOVA. \*\*\*  $p < 0.001$ .

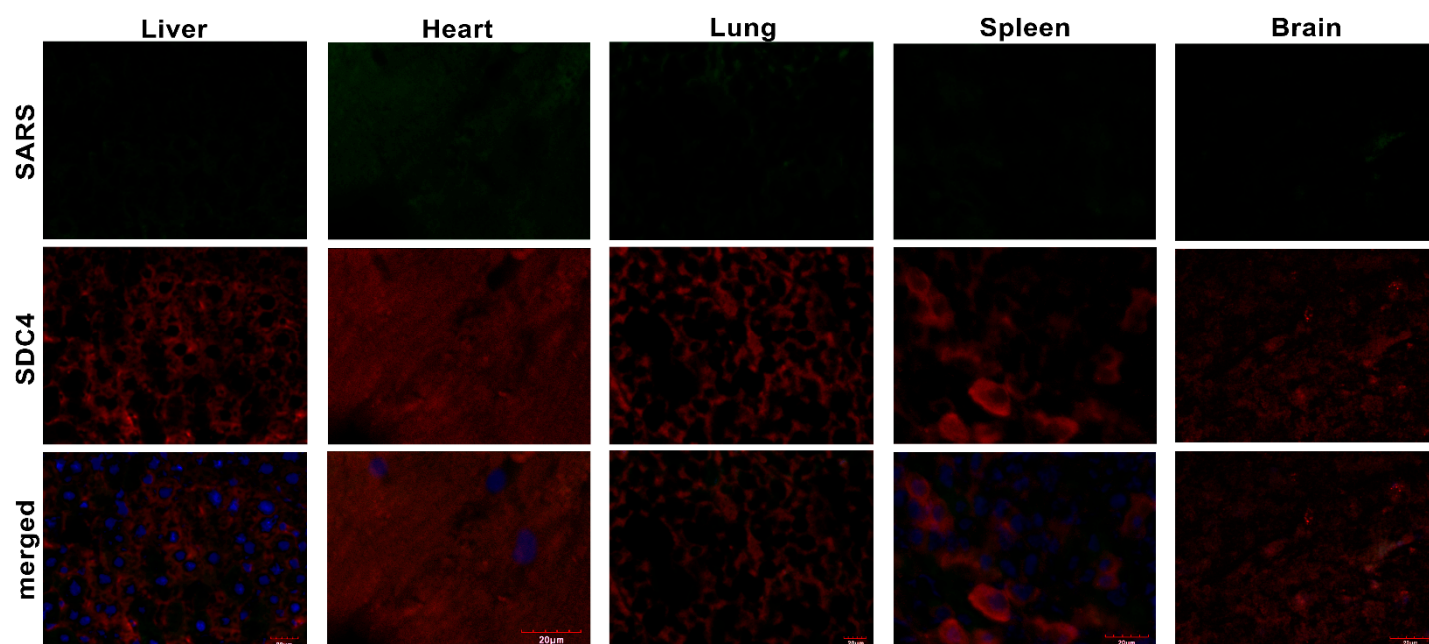

**Figure S8.** Microscopic studies on SARS-CoV-2-untreated control mice (i.e., those receiving no SARS-CoV-2 treatment). Liver, heart, lung, spleen and brain samples of mice receiving i.v. administration of 200  $\mu$ L of PBS were treated with antibodies specific SARS-CoV-2 spike (AF488-labeled) and SDC4 (APC-labeled). Representative images of three independent samples of six control animals are shown. Scale bar = 20  $\mu$ m.
